# Supplementary material
Source: PubMed Central journal article supplement (PMC4423404)

**Supplementary Table:**

**Supplementary Table 1:** List of 10 genes demonstrating at least 2-fold depletion in the shRNA screen in both LN229 and U87MG cell lines.

| Gene    | Function                                                                                                                      | LN229 | U87   |
|---------|-------------------------------------------------------------------------------------------------------------------------------|-------|-------|
| -       | -                                                                                                                             | -1.18 | -2.08 |
| ARFGEF1 | exocytosis   regulation of ARF protein signal transduction                                                                    | -1.02 | -1.42 |
| CAMK4   | protein amino acid phosphorylation   nucleocytoplasmic transport   signal transduction   nerve synaptic transmission          | -1.02 | -1.54 |
| CD9     | cell motility   cell adhesion   fusion of sperm to egg plasma membrane   platelet activation   paranodal junction assembly    | -1.19 | -2.07 |
| GIT2    | regulation of G-protein coupled receptor protein signaling pathway   regulation of ARF GTPase activity                        | -1.77 | -1.20 |
| GTF2H2  | DNA repair   transcription initiation   regulation of transcription, DNA-dependent   response to UV   DNA repair              | -1.09 | -1.87 |
| PRKCQ   | regulation of cell growth   protein amino acid phosphorylation   intracellular signaling cascade   activation of NF-kappaB    | -1.08 | -2.48 |
| RAC1    | cell motility   cell adhesion   small GTPase mediated signal transduction   actin filament polymerization   regulation of Rho | -1.06 | -2.03 |
| RAD21   | double-strand break repair   apoptosis   chromosome segregation   mitosis   meiotic recombination   cell division             | -1.47 | -2.22 |
| SAT1    | metabolic process                                                                                                             | -1.05 | -2.22 |

**Supplementary Figures:**

**Supplementary Figure 1:** shSAT1 effectively reduces SAT1 protein expression in denspermine treated D54MG cells.

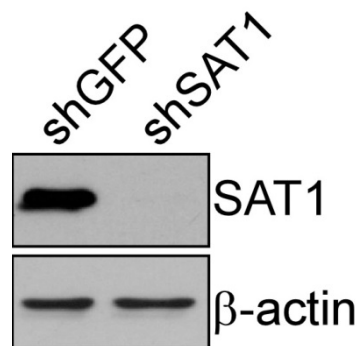

**Supplementary Figure 2:** SAT1 expression in shGFP and shSAT1 GBM0821 (A) and GBM0913 (B) tumors from **Figure 3** measured by qRT-PCR after sacrifice. Error bars represent standard deviations.

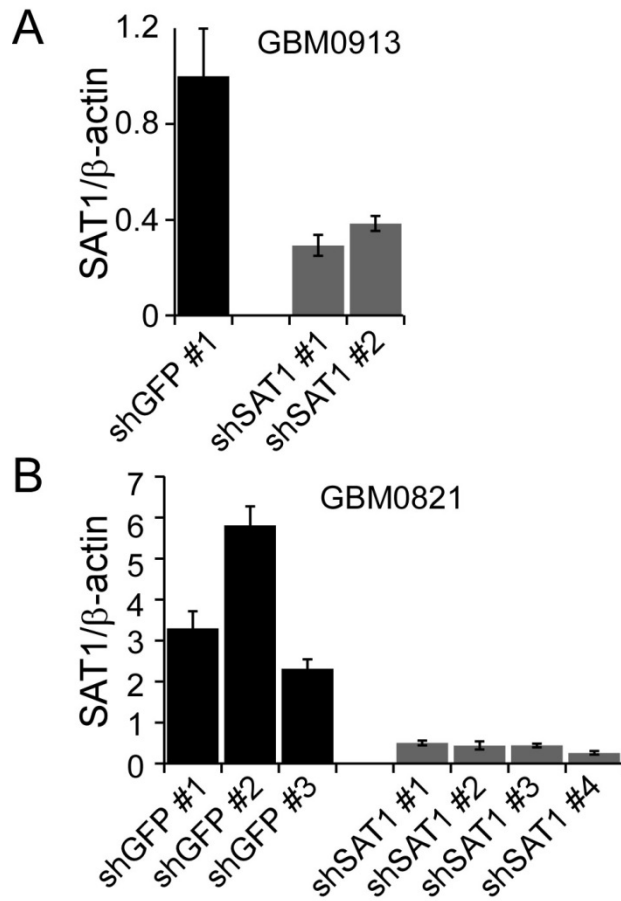

**Supplementary Figure 3:** Flow cytometry of Hoechst 33342 stained D54MG shGFP and shSAT1 cells identifying populations sorted for cell cycle specific colony assays from **Figure 5C**.

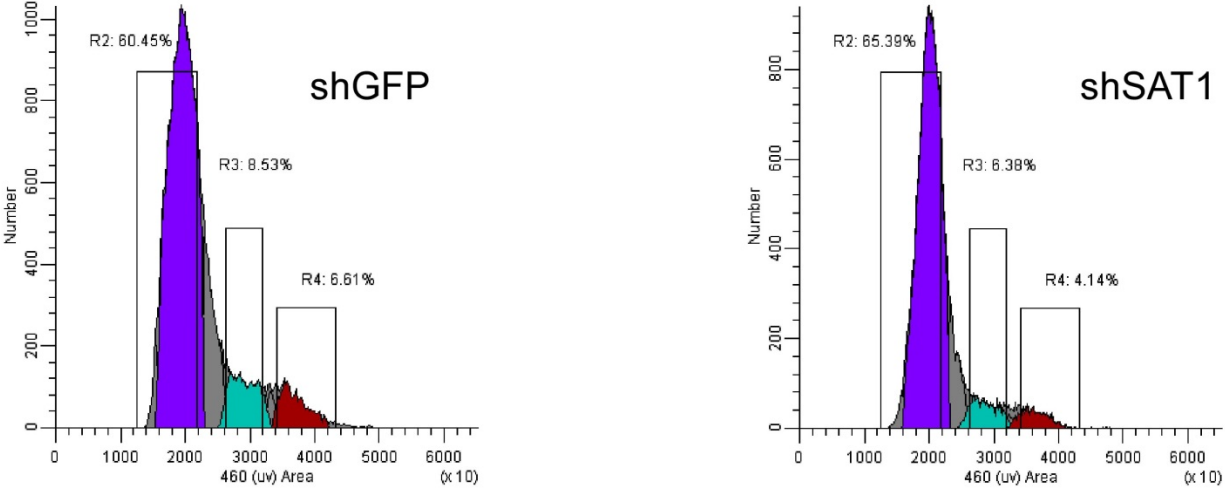

Supplement: NIHMS684783-supplement-1.pdf [file NIHMS684783-supplement-1.pdf]
